# Supplementary material
Source: HighWire-hosted journal article supplement (https://ard.bmj.com/content/77/9/1251)
Supplement: inline-supplementary-material-2 [file inline-supplementary-material-2.docx]

**2018 EULAR recommendations for physical activity in people with inflammatory arthritis and osteoarthritis**

**Supplement 2 - PICOs**

**PICO 1**

| Population | Adult people with RA*, OA**, SpA |
| --- | --- |
| Interventions | Physical activity promotion***  Exercise promotion*** |
| Comparators | As presented in the papers : usual care, attention to control, no treatment or waiting list control |
| Oucomes | **General health benefits**: cardiovascular risk, all-cause mortality/cancer, depression, weight, psychological well-being.  **Disease specific health benefits :**  cardiorespiratory fitness, muscle strength, ROM, functional abilities, activity limitation, physical function, fatique/anxiety/energy, quality of life, self-efficacy, bone health/sarcopenia, working ability, depression, sleep, health care utilisation, use of drugs, body composition, pain,..  **Additional outcomes derived from other research questions:** screening tools, assessment tools, exercise adaptions, provider, exercise setting, contraindication, safety, Behaviour change technique,.. |
| Study Type | Systematic literature reviews, meta-analyses, RCTs |

TABLE 1: PICO 1; *lower limb involvement only, ** hip and knee only, ***according to ACSM principles

**PICO 2**

| Population | People with RA*, OA**, SpA |
| --- | --- |
| Interventions (if RCT) | Behaviour change intervention regarding PA or exercise promotion*** |
| Comparators (if RCT) | As presented in the papers : usual care, attention to control, no treatment or waiting list control |
| Oucomes | Barrieres and facilitators regarding PA |
| Study Type | Systematic literature reviews, meta-analyses, RCTs, qualitative studies |

TABLE 2: PICO 2; *lower limb involvement only, ** hip and knee only, ***according to ACSM principles
